# Supplementary material for: Outcomes Following Taxation of Sugar-Sweetened Beverages: A Systematic Review and Meta-analysis
Source: PubMed Central journal article supplement (PMC9161017; doi:10.1001/jamanetworkopen.2022.15276), 2022-06-01

## Supplemental Online Content

Andreyeva T, Marple K, Marinello S, Moore TE, Powell LM. Outcomes following taxation of sugar-sweetened beverages: a systematic review and meta-analysis. *JAMA Netw Open*. 2022;5(6):e2215276. doi:10.1001/jamanetworkopen.2022.15276

**eAppendix 1.** Search Terms and Search Results

**eAppendix 2.** Computation of Price Elasticity of Demand and Cross-Price Elasticity of Demand Measures

**eTable 1.** Quality Assessment of Fiscal Policy Studies

**eTable 2.** Characteristics of Studies

**eTable 3.** Summary of Sensitivity and Sub-group Meta-Analyses

**eTable 4.** Sources of Heterogeneity ( $\tau^2$ ) for 3-Level Random Effects Models

**eFigure 1.** Meta-analysis of SSB Sales Following SSB Taxes: Percentage Change in Demand for Taxed Beverages

**eFigure 2.** Meta-analysis of Substitution Beverage Sales Following SSB Taxes: Cross-Price Elasticity

**eFigure 3.** Meta-analysis of SSB Consumption Following SSB Taxes: Price Elasticity of Demand for Taxed Beverages

**eFigure 4.** Meta-analysis of SSB Consumption Following SSB Taxes: Percentage Change in Demand for Taxed Beverages

**eFigure 5.** Meta-analysis of Consumption of Substitution Beverages Following SSB Taxes: Cross-Price Elasticity

**eFigure 6.** Publication Bias: Funnel Plots

This supplemental material has been provided by the authors to give readers additional information about their work.

## eAppendix 1. Search Terms and Search Results

### PubMed Search Terms

#### Concept #1: TREATMENT OR INTERVENTION

“Taxes”[MeSH] OR “Fiscal Policy”[MeSH] OR “Health Policy/economics”[MeSH] OR “Healthy Diet/economics” [MeSH] OR “Health Promotion/economics”[MeSH] OR “Consumer Behavior/economics”[MeSH] OR “Diet/economics”[MeSH] OR “Carbonated Beverages/economics”[MeSH] OR “Government Programs/economics”[MeSH] OR “Public Health/economics”[MeSH] OR tax[tiab] OR taxes[tiab] OR taxation[tiab] OR taxed[tiab] OR taxing[tiab] OR subsidy[tiab] OR subsidies[tiab] OR subsidized[tiab] OR coupon[tiab] OR coupons[tiab] OR incentive[tiab] OR incentives[tiab] OR disincentive[tiab] OR disincentives[tiab] OR discount[tiab] OR discounts[tiab] OR discounted[tiab] OR pricing[tiab] OR priced[tiab] OR “price reduction”[tiab] OR “price increase”[tiab] OR “price promotion”[tiab] OR “price promotions”[tiab] OR “price floor”[tiab] OR “price ceiling”[tiab] OR “price cap”[tiab] OR “price caps”[tiab] OR “pricing policy”[tiab] OR “pricing policies”[tiab] OR “fiscal policy”[tiab] OR “fiscal policies”[tiab] OR voucher[tiab] OR vouchers[tiab] OR rebate[tiab] OR rebates[tiab] OR levy[tiab]

AND

#### Concept #2: TARGETS FOR TREATMENT OR INTERVENTION

"Food"[MeSH] OR "Food and Beverages"[MeSH] OR "Beverages"[MeSH] OR "Sugars"[MeSH] OR "Fruit"[MeSH] OR "Vegetables"[MeSH] OR "Healthy Food"[MeSH] OR "Carbonated Beverages"[MeSH] OR "Dairy Products"[MeSH] OR "Meat"[MeSH] OR "Dietary Fats"[MeSH] OR "Fishes"[MeSH] OR "Seafood"[MeSH] OR "Infant formula"[MeSH] OR “sugary drink”[tiab] OR “sugary drinks”[tiab] OR “sugary beverages”[tiab] OR “sweetened beverage”[tiab] OR “sweetened beverages”[tiab] OR “sweetened drink”[tiab] OR “sweetened drinks”[tiab] OR “sugar-sweetened beverage”[tiab] OR “sugar-sweetened beverages”[tiab] OR “sugar-sweetened drink”[tiab] OR “sugar-sweetened drinks”[tiab] OR “carbonated beverage”[tiab] OR “carbonated beverages”[tiab] OR “carbonated-beverage”[tiab] OR “carbonated-beverages”[tiab] OR “carbonated drink”[tiab] OR “carbonated drinks”[tiab] OR “carbonated-drink”[tiab] OR “carbonated-drinks”[tiab] OR “high-calorie drink”[tiab] OR “high-calorie drinks”[tiab] OR “high calorie drink”[tiab] OR “high calorie drinks”[tiab] OR “high-calorie beverage”[tiab] OR “high-calorie beverages”[tiab] OR “high calorie beverage”[tiab] OR “high calorie beverages”[tiab] OR “low-calorie drink”[tiab] OR “low-calorie drinks”[tiab] OR “low calorie drink”[tiab] OR “low calorie drinks”[tiab] OR “low-calorie beverage”[tiab] OR “low-calorie beverages”[tiab] OR “low calorie beverage”[tiab] OR “low calorie beverages”[tiab] OR “soft drink”[tiab] OR “soft drinks”[tiab] OR “soft-drink”[tiab] OR “soft-drinks”[tiab] OR “fizzy drink”[tiab] OR “fizzy drinks”[tiab] OR “fizzy-drink”[tiab] OR “fizzy-drinks”[tiab] OR “energy drink”[tiab] OR “energy drinks”[tiab] OR “energy-drink”[tiab] OR “energy-drinks”[tiab] OR “fruit drink”[tiab] OR “fruit drinks”[tiab] OR “fruit-drink”[tiab] OR “fruit-drinks”[tiab] OR “sports

drink"[tiab] OR "sports drinks"[tiab] OR "sports-drink"[tiab] OR "sports-drinks"[tiab] OR tea[tiab] OR teas[tiab] OR coffee[tiab] OR coffees[tiab] OR soda[tiab] OR sodas[tiab] OR cola[tiab] OR colas[tiab] OR "flavored water"[tiab] OR "vitamin water"[tiab] OR SSB\*[tiab] OR "soda pop"[tiab] OR "chocolate milk"[tiab] OR "flavored milk"[tiab] OR juice[tiab] OR syrup\*[tiab] OR

"healthy food"[tiab] OR "healthy foods"[tiab] OR "unhealthy food"[tiab] OR "unhealthy foods"[tiab] OR "nutritious foods"[tiab] OR "junk food"[tiab] OR "junk foods"[tiab] OR "energy dense food"[tiab] OR "high-calorie food"[tiab] OR "highcalorie food"[tiab] OR "high calorie food"[tiab] OR "energy dense foods"[tiab] OR "high-calorie foods"[tiab] OR "highcalorie foods"[tiab] OR "high calorie foods"[tiab] OR "low-calorie food"[tiab] OR "lowcalorie food"[tiab] OR "low calorie food"[tiab] OR "low-calorie foods"[tiab] OR "lowcalorie foods"[tiab] OR "low calorie foods"[tiab] OR "highenergy food"[tiab] OR "high energy food"[tiab] OR "high-energy food"[tiab] OR "highenergy foods"[tiab] OR "high energy foods"[tiab] OR "high-energy foods"[tiab] OR "lowenergy food"[tiab] OR "low energy food"[tiab] OR "low-energy food"[tiab] OR "lowenergy foods"[tiab] OR "low energy foods"[tiab] OR "low-energy foods"[tiab] OR "low-fat"[tiab] OR "low fat"[tiab] OR "lowfat"[tiab] OR

"fatty food"[tiab] OR "fatty foods"[tiab] OR "fattening food"[tiab] OR "fattening-food"[tiab] OR "salty food"[tiab] OR "salty-food"[tiab] OR "processed food"[tiab] OR "fattening foods"[tiab] OR "fattening-foods"[tiab] OR "salty foods"[tiab] OR "salty-foods"[tiab] OR "processed foods"[tiab] OR "takeout food"[tiab] OR "take-out food"[tiab] OR "takeaway food"[tiab] OR "take-away food"[tiab] OR "takeout foods"[tiab] OR "take-out foods"[tiab] OR "takeaway foods"[tiab] OR "take-away foods"[tiab] OR "fast food"[tiab] OR "fast-food"[tiab] OR "fast foods"[tiab] OR "fast-foods"[tiab] OR fastfood[tiab] OR "healthy diet"[tiab] OR "healthy diets"[tiab] OR "unhealthy diet"[tiab] OR "unhealthy diets"[tiab] OR

fruit[tiab] OR fruits[tiab] OR vegetable[tiab] OR vegetables[tiab] OR legumes[tiab] OR pulses[tiab] OR beans[tiab] OR lentils[tiab] OR peas[tiab] OR peanut\*[tiab] OR salad[tiab] OR potato[tiab] OR potatoes[tiab] OR burger[tiab] OR candy[tiab] OR candies[tiab] OR confectionar\*[tiab] OR chips[tiab] OR snack[tiab] OR snacks[tiab] OR sweet[tiab] OR sweets[tiab] OR desert[tiab] OR "ice cream"[tiab] OR biscuit\*[tiab] OR cookie\*[tiab] OR chocolate\*[tiab] OR pizza[tiab] OR grain[tiab] OR grains[tiab] OR pasta[tiab] OR cereal[tiab] OR cereals[tiab] OR corn[tiab] OR maize[tiab] OR rice[tiab] OR wheat[tiab] OR barley[tiab] OR sorghum[tiab] OR oat[tiab] OR oats[tiab] OR oatmeal[tiab] OR rye[tiab] OR cassava[tiab] OR soybean[tiab] OR yam[tiab] OR plantain[tiab] OR millet[tiab] OR taro[tiab] OR milk[tiab] OR "low fat dairy"[tiab] OR "low-fat dairy"[tiab] OR "lowfat dairy"[tiab] OR butter[tiab] OR cheese[tiab] OR cheeses[tiab] OR margarine[tiab] OR lard[tiab] OR yogurt[tiab] OR "soybean oil"[tiab] OR "rapeseed oil"[tiab] OR "sunflower oil"[tiab] OR "olive oil"[tiab] OR "sesame oil"[tiab] OR "palm oil"[tiab] OR "coconut oil"[tiab] OR "cooking oil"[tiab] OR "vegetable oil"[tiab] OR "soya oil"[tiab] OR "peanut oil"[tiab] OR "groundnut oil"[tiab] OR fish[tiab] OR seafood[tiab] OR pollock[tiab] OR anchovy[tiab] OR tuna[tiab] OR sardine[tiab] OR mackerel[tiab] OR herring[tiab] OR cod[tiab] OR scad[tiab] OR hairtail[tiab] OR whiting[tiab] OR

squid[tiab] OR threadfin[tiab] OR menhaden[tiab] OR sprat[tiab] OR crab[tiab] OR shrimp[tiab] OR pilchard[tiab] OR

meat[tiab] OR meats[tiab] OR “lean protein”[tiab] OR beef[tiab] OR poultry[tiab] OR chicken[tiab] OR pork[tiab] OR mutton[tiab] OR goat[tiab] OR egg[tiab] OR eggs[tiab] OR fats[tiab] OR “saturated fat”[tiab] OR “unsaturated fat”[tiab] OR polyunsat\*[tiab] OR polyunsat\*[tiab] OR monounsat\*[tiab] OR mono-unsat\*[tiab] OR transfat[tiab] OR trans-fat\*[tiab] OR sodium [tiab] OR salt[tiab] OR sugar[tiab] OR sugars[tiab] OR sucrose[tiab] OR isoglucose[tiab] OR fiber[tiab] OR fibre[tiab] OR “infant formula”[tiab] OR “baby food”[tiab] OR “baby foods”[tiab] OR "infant food"[tiab] OR "infant foods"[tiab] OR “toddler formula”[tiab] OR “toddler milks”[tiab]

NOT

drug[tiab] or drugs[tiab]

Search results with the terms above on 7/3/19: n=8,261

Search results with the terms above on 1/31/20: n=258

Search results with the terms above on 6/01/20: n=205

## **Business Source Complete / CINAHL / EconLit / PSYCInfo Search Terms**

### **Concept #1: TREATMENT OR INTERVENTION**

TI(tax OR taxes OR taxation OR taxed OR taxing OR subsidy OR subsidies OR subsidized OR coupon OR coupons OR incentive OR incentives OR disincentive OR disincentives OR discount OR discounts OR discounted OR pricing OR priced OR “fiscal policy” OR “fiscal policies” OR voucher OR vouchers OR rebate OR rebates OR levy OR "price reduction" OR “price increase” OR "price promotion" OR “price promotions” OR “price floor” OR “price ceiling” OR “price cap” OR “price caps”) OR

AB(tax OR taxes OR taxation OR taxed OR taxing OR subsidy OR subsidies OR subsidized OR coupon OR coupons OR incentive OR incentives OR disincentive OR disincentives OR discount OR discounts OR discounted OR pricing OR priced OR “fiscal policy” OR “fiscal policies” OR voucher OR vouchers OR rebate OR rebates OR levy OR "price reduction" OR “price increase” OR "price promotion" OR “price promotions” OR “price floor” OR “price ceiling” OR “price cap” OR “price caps”)

AND

### **Concept #2: TARGETS FOR TREATMENT OR INTERVENTION**

TI("sugary drink" OR "sugary drinks" OR "sugary beverages" OR "sweetened beverage" OR "sweetened beverages" OR "sweetened drink" OR "sweetened drinks" OR "sugar-sweetened beverage" OR "sugar-sweetened beverages" OR "sugar-sweetened drink" OR "sugar-sweetened drinks" OR "carbonated beverage" OR "carbonated beverages" OR "carbonated-beverage" OR "carbonated-beverages" OR "carbonated drink" OR "carbonated drinks" OR "carbonated-drink" OR "carbonated-drinks" OR "high-calorie drink" OR "high-calorie drinks" OR "high calorie drink" OR "high calorie drinks" OR "high-calorie beverage" OR "high-calorie beverages" OR "high calorie beverage" OR "high calorie beverages" OR "low-calorie drink" OR "low-calorie drinks" OR "low calorie drink" OR "low calorie drinks" OR "low-calorie beverage" OR "low-calorie beverages" OR "low calorie beverage" OR "low calorie beverages" OR "soft drink" OR "soft drinks" OR "soft-drink" OR "soft-drinks" OR "fizzy drink" OR "fizzy drinks" OR "fizzy-drink" OR "fizzy-drinks" OR "energy drink" OR "energy drinks" OR "energy-drink" OR "energy-drinks" OR "fruit drink" OR "fruit drinks" OR "fruit-drink" OR "fruit-drinks" OR "sports drink" OR "sports drinks" OR "sports-drink" OR "sports-drinks" OR tea OR teas OR coffee OR coffees OR soda OR sodas OR cola OR colas OR "flavored water" OR "vitamin water" OR SSB\* OR "soda pop" OR "chocolate milk" OR "flavored milk" OR juice OR syrup\* OR "healthy food" OR "healthy foods" OR "unhealthy food" OR "unhealthy foods" OR "nutritious foods" OR "junk food" OR "junk foods" OR "energy dense food" OR "high-calorie food" OR "highcalorie food" OR "high calorie food" OR "energy dense foods" OR "high-calorie foods" OR "highcalorie foods" OR "high calorie foods" OR "low-calorie food" OR "lowcalorie food" OR "low calorie food" OR "low-calorie foods" OR "lowcalorie foods" OR "low calorie foods" OR "highenergy food" OR "high energy food" OR "high-energy food" OR "highenergy foods" OR "high energy foods" OR "high-energy foods" OR "lowenergy food" OR "low energy food" OR "low-energy food" OR "lowenergy foods" OR "low energy foods" OR "low-energy foods" OR "low-fat" OR "low fat" OR "lowfat" OR "fatty food" OR "fatty foods" OR "fattening food" OR "fattening-food" OR "salty food" OR "salty-food" OR "processed food" OR "fattening foods" OR "fattening-foods" OR "salty foods" OR "salty-foods" OR "processed foods" OR "takeout food" OR "take-out food" OR "takeaway food" OR "take-away food" OR "takeout foods" OR "take-out foods" OR "takeaway foods" OR "take-away foods" OR "fast food" OR "fast-food" OR "fast foods" OR "fast-foods" OR fastfood OR fruit OR fruits OR vegetable OR vegetables OR legumes OR pulses OR beans OR lentils OR peas OR peanut\* OR salad OR potato OR potatoes OR burger OR candy OR candies OR confectionar\* OR chips OR snack OR snacks OR sweet OR sweets OR desert OR "ice cream" OR biscuit\* OR cookie\* OR chocolate\* OR pizza OR chips OR grain OR grains OR pasta OR cereal OR cereals OR corn OR maize OR rice OR wheat OR barley OR sorghum OR oat OR oats OR oatmeal OR rye OR cassava OR soybean OR yam OR plantain OR millet OR taro OR milk OR "low fat dairy" OR "low-fat dairy" OR "lowfat dairy" OR butter OR cheese OR cheeses OR margarine OR lard OR yogurt OR "soybean oil" OR "rapeseed oil" OR "sunflower oil" OR "olive oil" OR "sesame oil" OR "palm oil" OR "coconut oil" OR "cooking oil" OR "vegetable oil" OR "soya oil" OR "peanut oil" OR "groundnut oil" OR fish OR fishes OR seafood OR pollock OR anchovy OR tuna OR sardine OR mackerel OR herring OR cod OR scad OR hairtail OR whiting OR squid OR threadfin OR menhaden OR sprat OR crab OR shrimp OR pilchard OR meat OR meats OR "lean protein" OR beef OR poultry OR chicken OR pork OR mutton OR goat OR egg OR eggs OR fats OR "saturated fat" OR "unsaturated fat" OR polyunsat\* OR poly-unsat\* OR monounsats\* OR mono-unsat\* OR transfat OR trans-fat\* OR sodium OR salt OR sugar OR sugars OR sucrose OR isoglucose OR fiber

OR fibre OR "infant formula" OR "baby food" OR "baby foods" OR "infant food" OR "infant foods" OR "toddler formula" OR "toddler milks") OR

AB("sugary drink" OR "sugary drinks" OR "sugary beverages" OR "sweetened beverage" OR "sweetened beverages" OR "sweetened drink" OR "sweetened drinks" OR "sugar-sweetened beverage" OR "sugar-sweetened beverages" OR "sugar-sweetened drink" OR "sugar-sweetened drinks" OR "carbonated beverage" OR "carbonated beverages" OR "carbonated-beverage" OR "carbonated-beverages" OR "carbonated drink" OR "carbonated drinks" OR "carbonated-drink" OR "carbonated-drinks" OR "high-calorie drink" OR "high-calorie drinks" OR "high calorie drink" OR "high calorie drinks" OR "high-calorie beverage" OR "high-calorie beverages" OR "high calorie beverage" OR "high calorie beverages" OR "low-calorie drink" OR "low-calorie drinks" OR "low calorie drink" OR "low calorie drinks" OR "low-calorie beverage" OR "low-calorie beverages" OR "low calorie beverage" OR "low calorie beverages" OR "soft drink" OR "soft drinks" OR "soft-drink" OR "soft-drinks" OR "fizzy drink" OR "fizzy drinks" OR "fizzy-drink" OR "fizzy-drinks" OR "energy drink" OR "energy drinks" OR "energy-drink" OR "energy-drinks" OR "fruit drink" OR "fruit drinks" OR "fruit-drink" OR "fruit-drinks" OR "sports drink" OR "sports drinks" OR "sports-drink" OR "sports-drinks" OR tea OR teas OR coffee OR coffees OR soda OR sodas OR cola OR colas OR "flavored water" OR "vitamin water" OR SSB\* OR "soda pop" OR "chocolate milk" OR "flavored milk" OR juice OR syrup\* OR "healthy food" OR "healthy foods" OR "unhealthy food" OR "unhealthy foods" OR "nutritious foods" OR "junk food" OR "junk foods" OR "energy dense food" OR "high-calorie food" OR "highcalorie food" OR "high calorie food" OR "energy dense foods" OR "high-calorie foods" OR "highcalorie foods" OR "high calorie foods" OR "low-calorie food" OR "lowcalorie food" OR "low calorie food" OR "low-calorie foods" OR "lowcalorie foods" OR "low calorie foods" OR "highenergy food" OR "high energy food" OR "high-energy food" OR "highenergy foods" OR "high energy foods" OR "high-energy foods" OR "lowenergy food" OR "low energy food" OR "low-energy food" OR "lowenergy foods" OR "low energy foods" OR "low-energy foods" OR "low-fat" OR "low fat" OR "lowfat" OR "fatty food" OR "fatty foods" OR "fattening food" OR "fattening-food" OR "salty food" OR "salty-food" OR "processed food" OR "fattening foods" OR "fattening-foods" OR "salty foods" OR "salty-foods" OR "processed foods" OR "takeout food" OR "take-out food" OR "takeaway food" OR "take-away food" OR "takeout foods" OR "take-out foods" OR "takeaway foods" OR "take-away foods" OR "fast food" OR "fast-food" OR "fast foods" OR "fast-foods" OR fastfood OR fruit OR fruits OR vegetable OR vegetables OR legumes OR pulses OR beans OR lentils OR peas OR peanut\* OR salad OR potato OR potatoes OR burger OR candy OR candies OR confectionar\* OR chips OR snack OR snacks OR sweet OR sweets OR desert OR "ice cream" OR biscuit\* OR cookie\* OR chocolate\* OR pizza OR chips OR grain OR grains OR pasta OR cereal OR cereals OR corn OR maize OR rice OR wheat OR barley OR sorghum OR oat OR oats OR oatmeal OR rye OR cassava OR soybean OR yam OR plantain OR millet OR taro OR milk OR "low fat dairy" OR "low-fat dairy" OR "lowfat dairy" OR butter OR cheese OR cheeses OR margarine OR lard OR yogurt OR "soybean oil" OR "rapeseed oil" OR "sunflower oil" OR "olive oil" OR "sesame oil" OR "palm oil" OR "coconut oil" OR "cooking oil" OR "vegetable oil" OR "soya oil" OR "peanut oil" OR "groundnut oil" OR fish OR fishes OR seafood OR pollock OR anchovy OR tuna OR sardine OR mackerel OR herring OR cod OR scad OR hairtail OR whiting OR squid OR threadfin OR menhaden OR sprat OR crab OR shrimp OR

pilchard OR meat OR meats OR “lean protein” OR beef OR poultry OR chicken OR pork OR mutton OR goat OR egg OR eggs OR fats OR “saturated fat” OR “unsaturated fat” OR polyunsat\* OR poly-unsat\* OR monounsat\* OR mono-unsat\* OR transfat OR trans-fat\* OR sodium OR salt OR sugar OR sugars OR sucrose OR isoglucose OR fiber OR fibre OR “infant formula” OR “baby food” OR “baby foods” OR “infant food” OR “infant foods” OR “toddler formula” OR “toddler milks”)

NOT

(TI(drug OR drugs) OR AB(drug OR drugs))

LIMIT TO: Academic Journals

Search results with the terms and limitations above on 7/3/19:

Business Source Complete: n=3,816  
CINAHL: 842  
EconLit: n=2,830  
Proquest Dissertations & Theses: n=8,404  
PSYCIInfo: n=1,107

Search results with the terms and limitations above on 1/31/20:

Business Source Complete: n=133  
CINAHL: 172  
EconLit: n=153  
Proquest Dissertations & Theses: n=121  
PSYCIInfo: n=60

Search results with the terms and limitations above on 6/1/20:

Business Source Complete: n=57  
CINAHL: 49  
EconLit: n=13  
Proquest Dissertations & Theses: n=20  
PSYCIInfo: n=7

## **Cochrane Search Terms**

### **Concept #1: TREATMENT OR INTERVENTION**

((tax OR taxes OR taxation OR taxed OR taxing OR subsidy OR subsidies OR subsidized OR coupon OR coupons OR incentive OR incentives OR disincentive OR disincentives OR discount OR discounts OR discounted OR pricing OR priced OR “price promotion” OR “price promotions” OR “price floor” OR “price ceiling” OR “price cap” OR “price caps” OR “pricing policy” OR

“pricing policies” OR “fiscal policy” OR “fiscal policies” OR “price reduction” OR “price increase” OR voucher OR vouchers OR rebate OR rebates OR levy OR “price response”)):ti,ab,kw

AND

## **Concept #2: TARGETS FOR TREATMENT OR INTERVENTION**

((“sugary drink” OR “sugary drinks” OR “sugary beverages” OR “sweetened beverage” OR “sweetened beverages” OR “sweetened drink” OR “sweetened drinks” OR “sugar-sweetened beverage” OR “sugar-sweetened beverages” OR “sugar-sweetened drink” OR “sugar-sweetened drinks” OR “carbonated beverage” OR “carbonated beverages” OR “carbonated-beverage” OR “carbonated-beverages” OR “carbonated drink” OR “carbonated drinks” OR “carbonated-drink” OR “carbonated-drinks” OR “high-calorie drink” OR “high-calorie drinks” OR “high calorie drink” OR “high calorie drinks” OR “high-calorie beverage” OR “high-calorie beverages” OR “high calorie beverage” OR “high calorie beverages” OR “low-calorie drink” OR “low-calorie drinks” OR “low calorie drink” OR “low calorie drinks” OR “low-calorie beverage” OR “low-calorie beverages” OR “low calorie beverage” OR “low calorie beverages” OR “soft drink” OR “soft drinks” OR “soft-drink” OR “soft-drinks” OR “fizzy drink” OR “fizzy drinks” OR “fizzy-drink” OR “fizzy-drinks” OR “energy drink” OR “energy drinks” OR “energy-drink” OR “energy-drinks” OR “fruit drink” OR “fruit drinks” OR “fruit-drink” OR “fruit-drinks” OR “sports drink” OR “sports drinks” OR “sports-drink” OR “sports-drinks” OR tea OR teas OR coffee OR coffees OR soda OR sodas OR cola OR colas OR “flavored water” OR “vitamin water” OR SSB OR SSBs OR “soda pop” OR “chocolate milk” OR “flavored milk” OR juice OR syrup OR syrups OR “healthy food” OR “healthy foods” OR “unhealthy food” OR “unhealthy foods” OR “nutritious foods” OR “junk food” OR “junk foods” OR “energy dense food” OR “high-calorie food” OR “highcalorie food” OR “high calorie food” OR “energy dense foods” OR “high-calorie foods” OR “highcalorie foods” OR “high calorie foods” OR “low-calorie food” OR “lowcalorie food” OR “low calorie food” OR “low-calorie foods” OR “lowcalorie foods” OR “low calorie foods” OR “highenergy food” OR “high energy food” OR “high-energy food” OR “highenergy foods” OR “high energy foods” OR “high-energy foods” OR “lowenergy food” OR “low energy food” OR “low-energy food” OR “lowenergy foods” OR “low energy foods” OR “low-energy foods” OR “low-fat” OR “low fat” OR “lowfat” OR “fatty food” OR “fatty foods” OR “fattening food” OR “fattening-food” OR “salty food” OR “salty-food” OR “processed food” OR “fattening foods” OR “fattening-foods” OR “salty foods” OR “salty-foods” OR “processed foods” OR “takeout food” OR “take-out food” OR “takeaway food” OR “take-away food” OR “takeout foods” OR “take-out foods” OR “takeaway foods” OR “take-away foods” OR “fast food” OR “fast-food” OR “fast foods” OR “fast-foods” OR fastfood OR fruit OR fruits OR vegetable OR vegetables OR legumes OR pulses OR beans OR lentils OR peas OR peanut OR peanuts OR salad OR potato OR potatoes OR burger OR candy OR candies OR confectionary OR confectionaries OR chips OR snack OR snacks OR sweet OR sweets OR desert OR “ice cream” OR biscuit OR biscuits OR cookie OR cookies OR chocolate OR chocolates OR pizza OR chips OR grain OR grains OR pasta OR cereal OR cereals OR corn OR maize OR rice OR wheat OR barley OR sorghum OR oat OR oats OR oatmeal OR rye OR cassava OR soybean OR yam OR plantain OR millet OR taro OR milk OR “low fat dairy” OR “low-fat dairy” OR “lowfat dairy” OR butter OR cheese OR cheeses OR margarine OR lard OR yogurt OR



“soybean oil” OR “rapeseed oil” OR “sunflower oil” OR “olive oil” OR “sesame oil” OR “palm oil” OR “coconut oil” OR “cooking oil” OR “vegetable oil” OR “soya oil” OR “peanut oil” OR “groundnut oil” OR fish OR fishes OR seafood OR pollock OR anchovy OR tuna OR sardine OR mackerel OR herring OR cod OR scad OR hairtail OR whiting OR squid OR threadfin OR menhaden OR sprat OR crab OR shrimp OR pilchard OR meat OR meats OR “lean protein” OR beef OR poultry OR chicken OR pork OR mutton OR goat OR egg OR eggs OR fats OR “saturated fat” OR “unsaturated fat” OR polyunsaturated OR poly-unsaturated OR monounsaturated OR mono-unsaturated OR transfat OR trans-fats OR sodium OR salt OR sugar OR sugars OR sucrose OR isoglucose OR fiber OR fibre OR “infant formula” OR “baby food” OR “baby foods” OR “infant food” OR “infant foods” OR “toddler formula” OR “toddler milks”)):ti,ab,kw

NOT (drug OR drugs):ti,ab,kw

Search results in Cochrane CENTRAL with the terms above on 7/3/19: n=335

Search results in Cochrane CENTRAL with the terms above on 1/31/20: n=41

Search results in Cochrane CENTRAL with the terms above on 6/1/20: n=24

Search results in Cochrane CDSR with the terms above on 7/3/19: n=6

Search results in Cochrane CDSR with the terms above on 1/31/20: n=1

Search results in Cochrane CDSR with the terms above on 6/1/20: n=1

## SCOPUS Search Terms

### Concept #1: TREATMENT OR INTERVENTION

TITLE-ABS ( tax OR taxes OR taxation OR taxed OR taxing OR subsidy OR subsidies OR subsidized OR coupon OR coupons OR incentive OR incentives OR disincentive OR disincentives OR discount OR discounts OR discounted OR pricing OR priced OR "fiscal policy" OR "fiscal policies" OR voucher OR vouchers OR rebate OR rebates OR levy OR "price reduction" OR “price increase” OR "price promotion" OR "price promotions" OR "price floor" OR "price ceiling" OR "price cap" OR "price caps" )

AND

### Concept #2: TARGETS FOR TREATMENT OR INTERVENTION

TITLE-ABS ( "sugary drink" OR "sugary drinks" OR “sugary beverages” OR "sweetened beverage" OR "sweetened beverages" OR "sweetened drink" OR "sweetened drinks" OR "sugar-sweetened beverage" OR "sugar-sweetened beverages" OR "sugar-sweetened drink" OR "sugar-sweetened drinks" OR "carbonated beverage" OR "carbonated beverages" OR "carbonated-beverage" OR "carbonated-beverages" OR "carbonated drink" OR "carbonated drinks" OR "carbonated-drink" OR "carbonated-drinks" OR "high-calorie drink" OR "high-calorie drinks" OR "high calorie drink" OR "high calorie drinks" OR "high-calorie beverage" OR "high-calorie beverages" OR "high calorie beverage" OR "high calorie beverages" OR "low-calorie drink" OR "low-calorie drinks" OR "low calorie drink" OR "low calorie drinks"

OR "low-calorie beverage" OR "low-calorie beverages" OR "low calorie beverage" OR "low calorie beverages" OR "soft drink" OR "soft drinks" OR "soft-drink" OR "soft-drinks" OR "fizzy drink" OR "fizzy drinks" OR "fizzy-drink" OR "fizzy-drinks" OR "energy drink" OR "energy drinks" OR "energy-drink" OR "energy-drinks" OR "fruit drink" OR "fruit drinks" OR "fruit-drink" OR "fruit-drinks" OR "sports drink" OR "sports drinks" OR "sports-drink" OR "sports-drinks" OR tea OR teas OR coffee OR coffees OR soda OR sodas OR cola OR colas OR "flavored water" OR "vitamin water" OR ssb\* OR "soda pop" OR "chocolate milk" OR "flavored milk" OR juice OR syrup\* OR "healthy food" OR "healthy foods" OR "unhealthy food" OR "unhealthy foods" OR "nutritious foods" OR "junk food" OR "junk foods" OR "energy dense food" OR "high-calorie food" OR "highcalorie food" OR "high calorie food" OR "energy dense foods" OR "high-calorie foods" OR "highcalorie foods" OR "high calorie foods" OR "low-calorie food" OR "lowcalorie food" OR "low calorie food" OR "low-calorie foods" OR "lowcalorie foods" OR "low calorie foods" OR "highenergy food" OR "high energy food" OR "high-energy food" OR "highenergy foods" OR "high energy foods" OR "high-energy foods" OR "lowenergy food" OR "low energy food" OR "low-energy food" OR "lowenergy foods" OR "low energy foods" OR "low-energy foods" OR "low-fat" OR "low fat" OR "lowfat" OR "fatty food" OR "fatty foods" OR "fattening food" OR "fattening-food" OR "salty food" OR "salty-food" OR "processed food" OR "fattening foods" OR "fattening-foods" OR "salty foods" OR "salty-foods" OR "processed foods" OR "takeout food" OR "take-out food" OR "takeaway food" OR "take-away food" OR "takeout foods" OR "take-out foods" OR "takeaway foods" OR "take-away foods" OR "fast food" OR "fast-food" OR "fast foods" OR "fast-foods" OR fastfood OR fruit OR fruits OR vegetable OR vegetables OR legumes OR pulses OR beans OR lentils OR peas OR peanut\* OR salad OR potato OR potatoes OR burger OR candy OR candies OR confectionar\* OR chips OR snack OR snacks OR sweet OR sweets OR desert OR "ice cream" OR biscuit\* OR cookie\* OR chocolate\* OR pizza OR chips OR grain OR grains OR pasta OR cereal OR cereals OR corn OR maize OR rice OR wheat OR barley OR sorghum OR oat OR oats OR oatmeal OR rye OR cassava OR soybean OR yam OR plantain OR millet OR taro OR milk OR "low fat dairy" OR "low-fat dairy" OR "lowfat dairy" OR butter OR cheese OR cheeses OR margarine OR lard OR yogurt OR "soybean oil" OR "rapeseed oil" OR "sunflower oil" OR "olive oil" OR "sesame oil" OR "palm oil" OR "coconut oil" OR "cooking oil" OR "vegetable oil" OR "soya oil" OR "peanut oil" OR "groundnut oil" OR fish OR fishes OR seafood OR pollock OR anchovy OR tuna OR sardine OR mackerel OR herring OR cod OR scad OR hairtail OR whiting OR squid OR threadfin OR menhaden OR sprat OR crab OR shrimp OR pilchard OR meat OR meats OR "lean protein" OR beef OR poultry OR chicken OR pork OR mutton OR goat OR egg OR eggs OR fats OR "saturated fat" OR "unsaturated fat" OR polyunsat\* OR poly-unsat\* OR monounsat\* OR mono-unsat\* OR transfat OR trans-fat\* OR sodium OR salt OR sugar OR sugars OR sucrose OR isoglucose OR fiber OR fibre OR "infant formula" OR "baby food" OR "baby foods" OR "infant food" OR "infant foods" OR "toddler formula" OR "toddler milks" )

AND NOT TITLE-ABS ( drug OR drugs )

AND ( LIMIT-TO ( SRCTYPE , "j" ) )

Search results in SCOPUS with the terms above on 7/3/19: n=15,814

Search results in SCOPUS with the terms above on 1/31/20: n=1,542

Search results in SCOPUS with the terms above on 6/1/20: n=651

## Standard Grey Literature Search Terms

### **Concept #1: TREATMENT OR INTERVENTION**

(tax\* OR subsid\* OR coupon\* OR incentive\* OR discount\* OR pricing OR “price promotion” OR “pricing policy” OR “fiscal policy” OR voucher\* OR rebate\* OR levy)

AND

### **Concept #2: TARGETS FOR TREATMENT OR INTERVENTION**

(“sugary drinks” OR “sugar-sweetened beverages” OR “sweetened beverages” OR “soft drinks” OR soda OR “high-sugar” OR “healthy food” OR “nutritious food” OR “fatty food” OR “high-calorie” OR “energy-dense” OR “junk food” OR “unhealthy food” OR “low fat” OR sugar OR “processed food” OR “fast food” OR fruit OR vegetables OR grain OR milk OR meat OR snack OR “lean protein” OR fats OR “saturated fat” OR “infant formula” OR sodium)

Search results with the terms above on 8/17/19:

WHO’s International Clinical Trials Registry Platform: n=9

PDQ-Evidence for Informed Health Policymaking: n=56

HealthEvidence.org: n=35

WHO Global Index Medicus: n=63

WorldWideScience: n=1,318

Search results with the terms above on 1/31/20:

WHO’s International Clinical Trials Registry Platform: n=1

PDQ-Evidence for Informed Health Policymaking: n=0

HealthEvidence.org: n=50

WHO Global Index Medicus: n=6

WorldWideScience: n=30

Search results with the terms above on 6/1/20:

WHO’s International Clinical Trials Registry Platform: n=0

PDQ-Evidence for Informed Health Policymaking: n=0

HealthEvidence.org: n=17

WHO Global Index Medicus: n=0

WorldWideScience: n=0

Search results with the above terms and limited to the last three years and the top 500 most relevant results:

National Bureau of Economic Research: n=500

New papers added on 1/31 with the same search terms: 548

New papers added on 6/1 with the same search terms: 33

Search results with the above terms and limited to the top 500 most relevant results:

EconPapers: n=500

New papers added on 1/31 with the same search terms: 500

New papers added on 6/1 with the same search terms: 37

Search results with the above terms and limited to the top 100 most relevant results:

Google Scholar: n=100

New papers added on 1/31 with the same search terms: 100

New papers added on 6/1 with the same search terms: 94

Search results with the second concept only on 8/17/19:

Directory of Open Access Journals: n=250

New papers added on 1/31 with the same search terms: 65

New papers added on 6/1 with the same search terms: 20

### **Highly Simplified Grey Literature Search Terms**

"tax\*" OR "subsid\*" OR "coupon\*" OR "incentive\*" OR "discount\*" OR "pricing"

Free-text Search results with the terms above on 8/17/19:

EPPI-Centre Database of Promoting Health Effectiveness Reviews (DoPHER): n=359

EPPI-Centre Trials Register of Promoting Health Interventions (TRoPHI): n=324

Free-text Search results with the terms above on 6/1/20:

EPPI-Centre Database of Promoting Health Effectiveness Reviews (DoPHER): n=25

EPPI-Centre Trials Register of Promoting Health Interventions (TRoPHI): n=2

### **Two Word Grey Literature AND Combo Search Terms**

tax and beverages

tax and drinks

tax and food

incentive and beverages

incentive and drinks

incentive and food

subsidy and beverages

subsidy and drinks

subsidy and food

pricing and beverages  
pricing and drinks  
pricing and food  
"fiscal policy" and beverages  
"fiscal policy" and drinks  
"fiscal policy" and food

Search results with the terms above on 8/17/19:

SSRN eLibrary: n=1,226

New papers added on 1/31 with the same search terms: 54

New papers added on 6/1 with the same search terms: 0

### **Hand-Screened References**

References from systematic reviews identified using the search strategy above:  
n=2,109

References from papers meeting the inclusion criteria  
n=90

### **Hand-Screened Government Websites**

Reports from the World Health Organization website  
n=30

Reports from the United States Department of Agriculture website  
n=8

Reports from foreign government websites  
n=46

Reports from other government websites  
n=3

We used Covidence (<https://app.covidence.org>) and Mendeley (<https://www.mendeley.com>) as the reference management software to manage the review.

## eAppendix 2. Computation of Price Elasticity of Demand and Cross-Price Elasticity of Demand Measures

In this review, in addition to examining effect size estimates of outcomes for changes in demand (e.g., sales and consumption), we also convert each demand estimate into a common metric measure known as price elasticity of demand. The price elasticity of demand measure is calculated as a percentage change in demand (sales or consumption) over a percentage change in price. Cross price elasticity measures substitution effects and is calculated as a percentage change in demand of SSB substitute beverages over a percentage change in SSB prices due to SSB taxes. SSB substitute beverages are untaxed beverages or bottled water. To estimate the price elasticity of demand for taxed beverages, an overall measure of post-tax percentage change in price was calculated for each taxing jurisdiction.

Baseline prices of taxed beverages and estimates of tax pass-through were extracted from the studies that evaluated tax impacts on prices. Jurisdiction-specific pass-through rates were estimated in a meta-analysis of studies by jurisdiction. Percentage change in price for each jurisdiction was calculated by multiplying an estimated pass-through rate by the tax rate and dividing by the median baseline price. Elasticities and their confidence intervals were then computed from relative changes in demand by dividing estimates of the percentage change in demand and corresponding confidence intervals by the jurisdiction-level percentage change in price.

**eTable 1. Quality Assessment of Fiscal Policy Studies**

|               | Question                                                                                       | Scoring System (Yes = 1.0, Partial = 0.5, No = 0)                                                                                                                                                                                                                             |
|---------------|------------------------------------------------------------------------------------------------|-------------------------------------------------------------------------------------------------------------------------------------------------------------------------------------------------------------------------------------------------------------------------------|
| Control group | 1. Does the study compare outcomes in an appropriate control group?                            | Yes = Control group (e.g., not impacted by policy) or counterfactual used.                                                                                                                                                                                                    |
|               |                                                                                                | No = Uncontrolled study (no control group or counterfactual).                                                                                                                                                                                                                 |
| Measures      | 2. Does the study measure outcomes objectively?                                                | Yes = Objective measures: sales (scanner data), purchases (receipts of purchases), prices (scanner data), measured body weight/height, health measurements (e.g., blood pressure), 24-hour dietary intake recall, government/ administrative records.                         |
|               |                                                                                                | Partial = Data recorded by raters or households, e.g., households recording purchases without receipts.<br>No = Participant self-reported data: self-reported BMI, food frequency surveys, other surveys with self-reported data.                                             |
| Follow Up     | 3. Does the study assess outcomes in the same people/stores before and after the intervention? | Yes = Longitudinal design: same people/households/stores at baseline and follow-up.                                                                                                                                                                                           |
|               |                                                                                                | No = Not the same people/households/stores, e.g., repeated cross-sections or longitudinal data with high attrition rates (>25%).                                                                                                                                              |
| Duration      | 4. How many data points does the study examine before and after the intervention?              | Yes = The study has $\geq 3$ data points before and after the intervention.                                                                                                                                                                                                   |
|               |                                                                                                | Partial = The study meets the above criteria for either a pre- or post-intervention, but not both.                                                                                                                                                                            |
|               |                                                                                                | No = The study has 1-2 observations per pre- and post-assessment.                                                                                                                                                                                                             |
| Sample        | 5. Does the study use a representative sample of the population affected by the policy?        | Yes = Representative data of the affected population, e.g., random population sampling.                                                                                                                                                                                       |
|               |                                                                                                | Partial = Somewhat representative of the affected population, includes scanner household consumer panels.<br>No = Not fully representative or convenience sample, e.g., limited to only one store type or one chain, select list of products or brands or group of customers. |
| Sample        | 6. Does the study have a sufficient sample size?                                               | Yes = Sample size or power analyses provided and shows sufficient sample size.                                                                                                                                                                                                |
|               |                                                                                                | No = No information provided or individual sample sizes appear insufficient; e.g., $n < 500$ individuals per site/time period or store audits $n < 50$ per site/time period.                                                                                                  |

|                                                                                                                                                                                                         |                                                             |                                                                                                                                                                                                                                                         |
|---------------------------------------------------------------------------------------------------------------------------------------------------------------------------------------------------------|-------------------------------------------------------------|---------------------------------------------------------------------------------------------------------------------------------------------------------------------------------------------------------------------------------------------------------|
| Confounding                                                                                                                                                                                             | 7. Does the study adjust adequately for likely confounders? | Yes = If an ITS then it adjusted/removed the effect of existing time trends, seasonality, and economic fluctuations. If different people are in comparison groups, then also adjusts for demographic differences, such as age and socioeconomic status. |
|                                                                                                                                                                                                         |                                                             | Partial = Some of these factors were adjusted for.                                                                                                                                                                                                      |
|                                                                                                                                                                                                         |                                                             | No = None of these factors were adjusted for.                                                                                                                                                                                                           |
| <p><b>Total Score:</b> Sum scores on all measures (range 0 to 7)</p> <p>Low quality score <math>\leq 3.0</math></p> <p>Medium quality score 3.5-4.5</p> <p>High quality score <math>\geq 5.0</math></p> |                                                             |                                                                                                                                                                                                                                                         |



**eTable 2. Characteristics of Studies**

| Source                                 | Tax jurisdiction | Tax type (taxed beverages) <sup>a</sup>                                                | Outcome(s) included                          | Study design                         | Data source/type                                | Population <sup>b</sup> | Quality score | Peer-reviewed <sup>c</sup> |
|----------------------------------------|------------------|----------------------------------------------------------------------------------------|----------------------------------------------|--------------------------------------|-------------------------------------------------|-------------------------|---------------|----------------------------|
| Aguilar et al, <sup>29</sup> 2019      | Mexico           | 1 peso per liter excise tax (SSBs)                                                     | Price changes, SSB sales, sales/substitution | ITS with counterfactual              | Scanner: Kantar Worldpanel                      | All                     | High          | No <sup>c</sup>            |
| Alsukait et al, <sup>66</sup> 2020     | Saudi Arabia     | 50% ad valorem excise tax (carbonated SSBs) 100% ad valorem excise tax (energy drinks) | Price changes                                | Before and after with counterfactual | Administrative: General Authority of Statistics | All                     | Medium        | Yes                        |
|                                        |                  |                                                                                        | SSB sales, sales/substitution                | CBA                                  | Database: Euromonitor Passport                  |                         | Low           |                            |
| Alvarado et al, <sup>62</sup> 2017     | Barbados         | 10% ad valorem excise tax (SSBs)                                                       | Price changes                                | Uncontrolled before and after        | Scanner: one grocery chain                      | All                     | Low           | Yes                        |
| Alvarado et al, <sup>63</sup> 2019     | Barbados         | 10% ad valorem excise tax (SSBs)                                                       | SSB sales, sales/substitution                | ITS with counterfactual              | Scanner: one grocery chain                      | All                     | High          | Yes                        |
| Andalón and Gibson, <sup>41</sup> 2017 | Mexico           | 1 peso per liter excise tax (SSBs)                                                     | Price changes                                | Uncontrolled before and after        | Administrative: INEGI                           | All                     | Medium        | No                         |
|                                        |                  |                                                                                        | SSB sales                                    | Uncontrolled before and after        | Household survey: ENIGH                         |                         | Low           |                            |

|                                          |                  |                                            |                                                 |                                      |                                            |     |        |                 |
|------------------------------------------|------------------|--------------------------------------------|-------------------------------------------------|--------------------------------------|--------------------------------------------|-----|--------|-----------------|
| Arteaga et al, <sup>30</sup> 2017        | Mexico           | 1 peso per liter excise tax (SSBs)         | SSB sales                                       | Uncontrolled ITS                     | Industry survey: EMIM                      | All | Low    | No <sup>c</sup> |
| Baskin and Coary, <sup>76</sup> 2019     | Philadelphia, US | \$0.015 per ounce excise tax (SSBs, ASBs)  | SSB sales, sales/substitution UC (cross-border) | CBA                                  | Scanner: one grocery chain                 | All | Medium | Yes             |
| Berardi et al, <sup>53</sup> 2016        | France           | €0.0716 per liter excise tax (SSBs, ASBs)  | Price changes                                   | Before and after with counterfactual | Scanner: Pricing drive-through price lists | All | High   | Yes             |
| Bergman and Hansen, <sup>60</sup> 2019   | Denmark          | Up to DKK 1.65 per liter excise tax (SSBs) | Price changes                                   | Uncontrolled ITS                     | Administrative: Statistics Denmark         | All | Medium | Yes             |
| Bollinger and Sexton, <sup>82</sup> 2018 | Berkeley, US     | \$0.01 per ounce excise tax (SSBs)         | Price changes, SSB sales                        | CBA                                  | Scanner: Nielsen retail                    | All | High   | No              |
| Bonilla-Chacin et al, <sup>42</sup> 2016 | Mexico           | 1 peso per liter excise tax (SSBs)         | SSB sales, sales/substitution                   | Uncontrolled before and after        | Household survey: ENIGH                    | All | Low    | No              |
|                                          |                  |                                            | Price changes                                   | Uncontrolled before and after        | Administrative: INEGI                      |     | Medium |                 |
| Breeze et al, <sup>113</sup> 2018        | Sheffield, UK    | £0.20 beverage levy (SSBs)                 | SSB sales, sales/substitution                   | Uncontrolled ITS                     | Scanner: café sales                        | All | Medium | Yes             |
| Campos-Vázquez and Medina-               | Mexico           | 1 peso per liter excise tax (SSBs)         | Price changes                                   | Uncontrolled ITS                     | Administrative: Federal Consumer           | All | Medium | Yes             |

|                                   |        |                                                                                     |                                              |                         |                                                                                                                      |     |        |     |
|-----------------------------------|--------|-------------------------------------------------------------------------------------|----------------------------------------------|-------------------------|----------------------------------------------------------------------------------------------------------------------|-----|--------|-----|
| Cortina, <sup>31</sup><br>2019    |        |                                                                                     |                                              |                         | Protection Agency                                                                                                    |     |        |     |
| Capacci et al, <sup>54</sup> 2019 | France | €0.0716 per liter excise tax (SSBs, ASBs)                                           | Price changes                                | CBA                     | Administrative: Italian and French National Institutes of Statistics<br>Scanner: Kantar WorldPanel France, GfK Italy | All | High   | Yes |
|                                   |        |                                                                                     | SSB sales, sales/substitution                | CBA                     | Scanner: Kantar WorldPanel France, GfK Italy;<br>Survey: Italian Household Expenditure Survey                        |     | Medium |     |
| Caro et al, <sup>57</sup> 2018    | Chile  | 10% (<6.25g sugar/100 ml) and 18% (≥6.25 g sugar/100ml) ad valorem tax (SSBs, ASBs) | Price changes, SSB sales, sales/substitution | ITS with counterfactual | Scanner: Kantar World Panel Chile                                                                                    | All | High   | Yes |

|                                         |                                                       |                                                               |                                                  |     |                                                                                     |                          |        |                 |
|-----------------------------------------|-------------------------------------------------------|---------------------------------------------------------------|--------------------------------------------------|-----|-------------------------------------------------------------------------------------|--------------------------|--------|-----------------|
| Cawley and Frisvold, <sup>81</sup> 2017 | Berkeley, US                                          | \$0.01 per ounce excise tax (SSBs)                            | Price changes                                    | CBA | Primary: store audits                                                               | All                      | Medium | Yes             |
| Cawley et al, <sup>68</sup> 2018        | Philadelphia, US                                      | \$0.015 per ounce excise tax (SSBs, ASBs)                     | Price changes                                    | CBA | Primary: store audits                                                               | All                      | Medium | Yes             |
| Cawley et al, <sup>112</sup> 2018       | Boulder, US                                           | \$0.02 per ounce excise tax (SSBs)                            | Price changes                                    | CBA | Primary: store and limited-service restaurant audits, webscraping: restaurant menus | All                      | High   | No <sup>c</sup> |
| Cawley et al, <sup>70</sup> 2019        | Philadelphia, US                                      | \$0.015 per ounce excise tax (SSBs, ASBs)                     | SSB consumption, consumption/substitution        | CBA | Primary: longitudinal household survey                                              | Adults, children         | Low    | Yes             |
|                                         |                                                       |                                                               | SSB sales, sales/substitution, UC (cross-border) | CBA | Primary: household survey                                                           | Households with children | Low    | Yes             |
| Cawley et al, <sup>69</sup> 2019        | Philadelphia PA, Seattle WA, San Francisco/Oakland CA | \$0.01 to \$0.0175 per ounce excise tax (SSBs, ASBs and SSBs) | SSB sales, sales/substitution                    | CBA | Scanner: InfoScout Consumer Panel                                                   | All                      | High   | No <sup>c</sup> |
| Cawley et al, <sup>80</sup> 2020        | Philadelphia, US                                      | \$0.015 per ounce excise                                      | Price changes                                    | CBA | Primary: store audits                                                               | All                      | Medium | Yes             |

|                                          |                    |                                                                                                |                                                              |                               |                                                                              |                  |        |     |
|------------------------------------------|--------------------|------------------------------------------------------------------------------------------------|--------------------------------------------------------------|-------------------------------|------------------------------------------------------------------------------|------------------|--------|-----|
|                                          |                    | tax (SSBs, ASBs)                                                                               |                                                              |                               |                                                                              |                  |        |     |
| Cawley et al, <sup>99</sup> 2020         | Oakland, US        | \$0.01 per ounce excise tax (SSBs)                                                             | Price changes                                                | CBA                           | Primary: store audits                                                        | All              | Medium | Yes |
|                                          |                    |                                                                                                | SSB sales, sales/substitution, UC (cross-border)             | CBA                           | Primary: consumer surveys                                                    | Adults, children | Low    |     |
|                                          |                    |                                                                                                | SSB consumption, consumption/substitution, UC (cross-border) | CBA                           | Primary: longitudinal household survey                                       |                  |        |     |
| Chu et al, <sup>48</sup> 2020            | United Kingdom     | £0.24 per liter (≥8 g sugar/100 ml) and £0.18 per liter (5-8 g sugar/100 ml) excise tax (SSBs) | Product change                                               | Uncontrolled before and after | Web scraping: online tool my Supermarket, websites of 9 major grocery chains | All              | Low    | Yes |
| Coary and Baskin, <sup>77</sup> 2018     | Philadelphia, US   | \$0.015 per ounce excise tax (SSBs, ASBs)                                                      | Price changes                                                | CBA                           | Primary: store audits                                                        | All              | Low    | Yes |
| Colantuoni and Rojas, <sup>93</sup> 2015 | Ohio and Maine, US | 5.5% (ME) and 5.0% (OH) state sales tax (soft drinks)                                          | Price changes, SSB sales                                     | CBA                           | Scanner: IRI retail                                                          | All              | High   | Yes |

|                                      |                      |                                                         |                               |                                      |                                                          |     |        |     |
|--------------------------------------|----------------------|---------------------------------------------------------|-------------------------------|--------------------------------------|----------------------------------------------------------|-----|--------|-----|
| Colchero et al, <sup>32</sup> 2015   | Mexico               | 1 peso per liter excise tax (SSBs)                      | Price changes                 | Uncontrolled ITS                     | Administrative: INEGI                                    | All | High   | Yes |
| Colchero et al, <sup>33</sup> 2016   | Mexico               | 1 peso per liter excise tax (SSBs)                      | SSB sales, sales/substitution | Uncontrolled ITS                     | Industry survey: EMIM                                    | All | Medium | Yes |
| Colchero et al, <sup>34</sup> 2016   | Mexico               | 1 peso per liter excise tax (SSBs)                      | SSB sales, sales/substitution | ITS with counterfactual              | Scanner: Nielsen Mexico Consumer Panel Services          | All | High   | Yes |
| Colchero et al, <sup>35</sup> 2017   | Mexico               | 1 peso per liter excise tax (SSBs)                      | SSB sales, sales/substitution | ITS with counterfactual              | Scanner: Nielsen Mexico Consumer Panel Services          | All | High   | Yes |
| Colchero et al, <sup>36</sup> 2017   | Mexico               | 1 peso per liter excise tax (SSBs)                      | Price changes                 | Uncontrolled before and after        | Primary: store audits                                    | All | Low    | Yes |
| Colchero et al, <sup>37</sup> 2017   | Mexico               | 1 peso per liter excise tax (SSBs)                      | SSB sales, sales/substitution | Before and after with counterfactual | Household survey: ENIGH                                  | All | Medium | Yes |
| Cornelsen et al, <sup>114</sup> 2017 | Restaurant chain, UK | £0.10 levy (SSBs)                                       | SSB sales, sales/substitution | Uncontrolled ITS                     | Scanner: one restaurant chain                            | All | Low    | Yes |
| Cuadrado et al, <sup>58</sup> 2020   | Chile                | 10% (<6.25g sugar/100 ml) and 18% (≥6.25 g sugar/100ml) | Price changes                 | Uncontrolled ITS                     | Administrative: Chilean National Institute of Statistics | All | Medium | Yes |

|                                  |                |                                                                                                       |                          |                               |                                |     |      |                 |
|----------------------------------|----------------|-------------------------------------------------------------------------------------------------------|--------------------------|-------------------------------|--------------------------------|-----|------|-----------------|
|                                  |                | ) ad valorem<br>ad valorem<br>excise tax<br>(SSBs, ASBs)                                              |                          |                               |                                |     |      |                 |
| Dubois et al, <sup>46</sup> 2020 | United Kingdom | £0.24 per liter (≥8 g sugar/100 ml) and £0.18 per liter (5-8 g sugar/100 ml) excise tax (SSBs)        | Price changes            | Uncontrolled ITS              | Scanner: Kantar Worldpanel     | All | High | No <sup>c</sup> |
| ECSIPC, <sup>56</sup> 2014       | Denmark        | DKK 0.82 per iL (>0.5g sugar/100 ml) and DKK 0.295/il (<0.5g/100 ml) (excise tax (soft drinks, juice) | Price changes, SSB sales | Uncontrolled before and after | Database: Euromonitor Passport | All | Low  | No              |
|                                  | Finland        | €0.11-0.22 per liter excise duty tax (SSBs, ASBs)                                                     |                          |                               |                                |     |      |                 |
|                                  | France         | €0.0716 per liter excise tax (SSBs, ASBs)                                                             |                          |                               |                                |     |      |                 |

|                                    |                             |                                                                                 |                                                                |                                      |                            |          |        |     |
|------------------------------------|-----------------------------|---------------------------------------------------------------------------------|----------------------------------------------------------------|--------------------------------------|----------------------------|----------|--------|-----|
|                                    | Hungary                     | 7 HUF per liter (>8g sugar/100ml), 250 HUF per liter (energy drinks) excise tax |                                                                |                                      |                            |          |        |     |
| Etilé et al, <sup>55</sup> 2018    | France                      | €0.0716 per liter excise tax (SSBs, ASBs)                                       | Price changes                                                  | Before and after with counterfactual | Scanner: Kantar Worldpanel | All      | High   | No  |
| Falbe et al, <sup>83</sup> 2015    | Berkeley, US                | \$0.01 per ounce excise tax (SSBs)                                              | Price changes                                                  | CBA                                  | Primary: store audits      | All      | Medium | Yes |
| Falbe et al, <sup>84</sup> 2016    | Berkeley, US                | \$0.01 per ounce excise tax (SSBs)                                              | SSB consumption, consumption/substitution                      | CBA                                  | Primary: consumer surveys  | Adults   | Low    | Yes |
| Falbe et al, <sup>100</sup> 2020   | Oakland & San Francisco, US | \$0.01 per ounce excise tax (SSBs)                                              | Price changes                                                  | CBA                                  | Primary: store audits      | All      | High   | Yes |
| Fletcher et al, <sup>95</sup> 2010 | US                          | 0-7.25% sales tax (soft drinks)                                                 | BMI, dietary intake, SSB consumption, consumption/substitution | Cross-sectional with fixed effects   | Household survey: NHANES   | Children | Medium | Yes |
| Fletcher et al, <sup>97</sup> 2010 | US                          | 0-7.25% sales tax (soft drinks)                                                 | BMI, SSB consumption                                           | Cross-sectional                      | Household survey: NHANES   | Children | Medium | Yes |



|                                           |          |                                                                                               |                                                                |                                      |                                  |        |        |                 |
|-------------------------------------------|----------|-----------------------------------------------------------------------------------------------|----------------------------------------------------------------|--------------------------------------|----------------------------------|--------|--------|-----------------|
|                                           |          |                                                                                               |                                                                | with fixed effects                   |                                  |        |        |                 |
| Fletcher et al, <sup>96</sup> 2010        | US       | 0-7.25% sales tax (soft drinks)                                                               | BMI                                                            | Cross-sectional with fixed effects   | Household survey: BRFSS          | Adults | Medium | Yes             |
| Fletcher et al, <sup>94</sup> 2015        | Ohio, US | \$0.01 per 12-ounce can excise tax (soft drinks)<br><br>0-7.25% state sales tax (soft drinks) | BMI                                                            | CBA                                  | Household survey: BRFSS          | Adults | Medium | Yes             |
|                                           | US       |                                                                                               | BMI, dietary intake, SSB consumption, consumption/substitution | Cross-sectional with fixed effects   | Household survey: NHANES         |        |        |                 |
| Goiana-da-Silva et al, <sup>65</sup> 2020 | Portugal | €8.22 per hl (<80 g sugar/l) and €16.69 per hl (≥80 g sugar/l) excise tax (SSBs, ASBs)        | Price changes, SSB sales                                       | ITS with counterfactual              | Scanner: Nielsen Consumer Panel  | All    | High   | Yes             |
|                                           |          |                                                                                               | Product change                                                 |                                      | Nutritional database: GlobalData |        |        |                 |
| Gonçalves and Santos, <sup>64</sup> 2019  | Portugal | €8.22 per hl (<80 g sugar/l) and €16.69 per hl (≥80 g sugar/l)                                | Price changes, SSB sales                                       | Before and after with counterfactual | Scanner: one grocery chain       | All    | High   | No <sup>c</sup> |

|                                          |                |                                                                                                |                    |                               |                                                                      |     |      |     |
|------------------------------------------|----------------|------------------------------------------------------------------------------------------------|--------------------|-------------------------------|----------------------------------------------------------------------|-----|------|-----|
|                                          |                | excise tax (SSBs, ASBs)                                                                        |                    |                               |                                                                      |     |      |     |
| Grogger, <sup>38</sup> 2017              | Mexico         | 1 peso per liter excise tax (SSBs)                                                             | Price changes      | ITS with counterfactual       | Administrative: INEGI                                                | All | High | Yes |
| Guerrero-López et al, <sup>43</sup> 2017 | Mexico         | 1 peso per liter excise tax (SSBs)                                                             | UC (unemployment)  | Uncontrolled ITS              | Industry survey: EMIM                                                | All | High | Yes |
| Hashem et al, <sup>49</sup> 2019         | United Kingdom | £0.24 per liter (≥8 g sugar/100 ml) and £0.18 per liter (5-8 g sugar/100 ml) excise tax (SSBs) | Product change     | Uncontrolled before and after | Primary: product packaging audits<br>Foodswitch United Kingdom       | All | Low  | Yes |
| Hoffer and Sheehan, <sup>92</sup> 2020   | Washington, US | \$0.02 per ounce excise tax (soft drinks)                                                      | SSB sales          | CBA                           | Survey: Consumer expenditure surveys                                 | All | Low  | Yes |
| Law et al, <sup>51</sup> 2020            | United Kingdom | £0.24 per liter (≥8 g sugar/100 ml) and £0.18 per liter (5-8 g sugar/100 ml) excise tax (SSBs) | UC (market return) | Uncontrolled ITS              | Administrative: London Stock Exchange listed soft-drink firm reports | All | Low  | Yes |

|                                      |                  |                                                                                                |                                           |                  |                                                   |        |        |     |
|--------------------------------------|------------------|------------------------------------------------------------------------------------------------|-------------------------------------------|------------------|---------------------------------------------------|--------|--------|-----|
| Law et al, <sup>50</sup> 2020        | United Kingdom   | £0.24 per liter (≥8 g sugar/100 ml) and £0.18 per liter (5-8 g sugar/100 ml) excise tax (SSBs) | UC (turnover)                             | Uncontrolled ITS | Industry survey: Monthly Business Survey          | All    | Medium | Yes |
| Lawman et al, <sup>78</sup> 2019     | Philadelphia, US | \$0.015 per ounce excise tax (SSBs, ASBs)                                                      | UC (unemployment)                         | Controlled ITS   | Administrative: unemployment compensation program | All    | High   | Yes |
| Lee et al, <sup>85</sup> 2019        | Berkeley, US     | \$0.01 per ounce excise tax (SSBs)                                                             | SSB consumption, consumption/substitution | CBA              | Primary: consumer surveys                         | Adults | Low    | Yes |
| Leider et al, <sup>103</sup> 2018    | Cook County, US  | \$0.01 per ounce excise tax (SSBs, ASBs)                                                       | Price changes                             | CBA              | Primary: store audits                             | All    | High   | No  |
| Lozano-Rojas, <sup>86</sup> 2020     | Berkeley, US     | \$0.01 per ounce excise tax (SSBs)                                                             | Price changes, SSB sales                  | CBA              | Scanner: Nielsen retail                           | All    | High   | No  |
| Marinello et al, <sup>101</sup> 2019 | Oakland, US      | \$0.01 per ounce excise tax (SSBs)                                                             | Price changes                             | CBA              | Primary: restaurant audits                        | All    | Medium | Yes |

|                                            |                      |                                                                                                                        |                                                     |                                                |                                                             |     |      |                 |
|--------------------------------------------|----------------------|------------------------------------------------------------------------------------------------------------------------|-----------------------------------------------------|------------------------------------------------|-------------------------------------------------------------|-----|------|-----------------|
| Mendez, <sup>87</sup><br>2019              | Berkeley,<br>US      | \$0.01 per<br>ounce excise<br>tax (SSBs)                                                                               | Price changes,<br>SSB sales                         | CBA                                            | Scanner:<br>Nielsen retail                                  | All | High | No              |
| Mora et al, <sup>109</sup><br>2018         | Catalonia,<br>Spain  | €0.08 per<br>liter (5-8 g<br>sugar/100<br>ml) and<br>€0.12 per<br>liter (≥8 g<br>sugar/100<br>ml) excise<br>tax (SSBs) | Price changes,<br>SSB sales, sales/<br>substitution | CBA                                            | Scanner: one<br>grocery chain                               | All | High | No <sup>c</sup> |
| Nakamura et<br>al, <sup>59</sup> 2018      | Chile                | 10% (<6.25g<br>sugar/100<br>ml) and 18%<br>(≥6.25 g<br>sugar/100ml<br>) ad valorem<br>excise tax<br>(SSBs, ASBs)       | Price changes,<br>SSB sales, sales/<br>substitution | Uncontrolled<br>ITS                            | Scanner:<br>Kantar<br>Worldpanel                            | All | High | Yes             |
| Ng et al, <sup>39</sup><br>2019            | Mexico               | 1 peso per<br>liter excise<br>tax (SSBs)                                                                               | SSB sales, sales/<br>substitution                   | Before and<br>after with<br>counterfactu<br>al | Scanner:<br>Nielsen<br>Mexico<br>Consumer<br>Panel Services | All | High | Yes             |
| Oxford<br>Economics, <sup>79</sup><br>2017 | Philadelphi<br>a, US | \$0.015 per<br>ounce excise<br>tax (SSBs,<br>ASBs)                                                                     | Price changes,<br>SSB sales, UC<br>(cross-border)   | Uncontrolled<br>before and<br>after            | Scanner: IRI<br>retail<br><br>Bottler sales                 | All | Low  | No              |

|                                                            |                  |                                                                                                |                                                  |                                    |                                                 |        |        |     |
|------------------------------------------------------------|------------------|------------------------------------------------------------------------------------------------|--------------------------------------------------|------------------------------------|-------------------------------------------------|--------|--------|-----|
| Pak, <sup>98</sup> 2013                                    | US               | 0-7.25% state sales tax (soft drinks)                                                          | BMI                                              | Cross-sectional with fixed effects | Household survey: BRFSS                         | Adults | Medium | No  |
| Pedraza et al, <sup>44</sup> 2018                          | Mexico           | 1 peso per liter excise tax (SSBs)                                                             | SSB sales, sales/substitution                    | Uncontrolled ITS                   | Scanner: Nielsen Mexico Consumer Panel Services | All    | Medium | Yes |
| Pedraza et al, <sup>40</sup> 2019                          | Mexico           | 1 peso per liter excise tax (SSBs)                                                             | SSB sales, sales/substitution                    | Uncontrolled ITS                   | Scanner: Nielsen Mexico Consumer Panel Services | All    | High   | Yes |
| Public Health England, <sup>52</sup> 2019                  | United Kingdom   | £0.24 per liter (≥8 g sugar/100 ml) and £0.18 per liter (5-8 g sugar/100 ml) excise tax (SSBs) | Product change, SSB sales, sales/substitution    | Uncontrolled before and after      | Scanner: Kantar Worldpanel                      | All    | Medium | No  |
| Public Health Seattle and King County, <sup>108</sup> 2019 | Seattle, US      | \$0.0175 per ounce excise tax (SSBs)                                                           | Price changes                                    | CBA                                | Primary: store audits                           | All    | High   | No  |
| Pizzutti, <sup>71</sup> 2019                               | Philadelphia, US | \$0.015 per ounce excise                                                                       | SSB sales, sales/substitution, UC (cross-border) | CBA                                | Scanner: one convenience store chain            | All    | High   | No  |

|                                           |                  |                                                             |                                                                 |     |                          |                           |      |                 |
|-------------------------------------------|------------------|-------------------------------------------------------------|-----------------------------------------------------------------|-----|--------------------------|---------------------------|------|-----------------|
|                                           |                  | tax (SSBs, ASBs)                                            |                                                                 |     |                          |                           |      |                 |
| Powell et al, <sup>104</sup> 2020         | Cook County, US  | \$0.01 per ounce excise tax (SSBs, ASBs)                    | SSB sales, sales/substitution, UC (cross-border)                | CBA | Scanner: Nielsen retail  | All                       | High | Yes             |
| Powell et al, <sup>105</sup> 2020         | Cook County, US  | \$0.01 per ounce excise tax (SSBs, ASBs)                    | Price changes                                                   | CBA | Scanner: Nielsen retail  | All                       | High | Yes             |
| Powell and Leider, <sup>106</sup> 2020    | Seattle, US      | \$0.0175 per ounce excise tax (SSBs)                        | Price changes, SSB sales, sales/substitution, UC (cross-border) | CBA | Scanner: Nielsen retail  | All                       | High | Yes             |
| Roberto et al, <sup>72</sup> 2019         | Philadelphia, US | \$0.015 per ounce excise tax (SSBs, ASBs)                   | Price changes, SSB sales, sales/substitution, UC (cross-border) | CBA | Scanner: IRI retail      | All                       | High | Yes             |
| Rojas and Wang, <sup>88</sup> 2017        | Berkeley, US     | \$0.01 per ounce excise tax (SSBs)                          | Price changes, SSB sales, sales/substitution                    | CBA | Scanner: Nielsen retail  | All                       | High | No <sup>c</sup> |
|                                           | Washington, US   | \$0.02 per 12-ounce can excise tax (carbonated soft drinks) |                                                                 |     |                          |                           |      |                 |
| Royo-Bordonada et al, <sup>110</sup> 2019 | Catalonia, Spain | €0.08 per liter (5-8 g sugar/100)                           | SSB consumption,                                                | CBA | Primary: consumer survey | Adolescents, young adults | Low  | Yes             |

|                                          |                |                                                                                                       |                                                  |                               |                                                                    |                  |      |     |
|------------------------------------------|----------------|-------------------------------------------------------------------------------------------------------|--------------------------------------------------|-------------------------------|--------------------------------------------------------------------|------------------|------|-----|
|                                          |                | ml) and €0.12 per liter ( $\geq 8$ g sugar/100 ml) excise tax (SSBs)                                  | consumption/<br>substitution                     |                               |                                                                    |                  |      |     |
| Saelens et al, <sup>107</sup> 2020       | Seattle, US    | \$0.0175 per ounce excise tax (SSBs)                                                                  | Price changes                                    | CBA                           | Primary: store audits                                              | All              | High | No  |
|                                          |                |                                                                                                       | SSB consumption, consumption/<br>substitution    | CBA                           | Primary: longitudinal household survey                             | Adults, children | Low  |     |
| Sánchez-Romero et al, <sup>45</sup> 2020 | Mexico         | 1 peso per liter excise tax (SSBs)                                                                    | SSB consumption                                  | Uncontrolled before and after | Survey: Health Workers Cohort Study                                | Adults           | Low  | Yes |
| Scarborough et al, <sup>47</sup> 2020    | United Kingdom | £0.24 per liter ( $\geq 8$ g sugar/100 ml) and £0.18 per liter (5-8 g sugar/100 ml) excise tax (SSBs) | Price changes, product change                    | ITS with counterfactual       | Web-scaping: websites of 6 UK supermarkets using FoodDB; BrandView | All              | High | Yes |
| Schmacker and Smed, <sup>61</sup> 2020   | Denmark        | 0-Up to DKK 1.58 per liter ( $>0.5$ g sugar/100 ml) and up to DKK 0.57                                | Price changes, SSB sales, sales/<br>substitution | Uncontrolled ITS              | Scanner: GfK Denmark Consumer Panel                                | All              | High | Yes |

|                                  |                  |                                                                 |                                                                 |                               |                                                                |        |      |                 |
|----------------------------------|------------------|-----------------------------------------------------------------|-----------------------------------------------------------------|-------------------------------|----------------------------------------------------------------|--------|------|-----------------|
|                                  |                  | per liter (≤0.5 g sugar/100 ml) excise tax (SSBs, ASBs)         |                                                                 |                               |                                                                |        |      |                 |
| Seiler et al, <sup>73</sup> 2019 | Philadelphia, US | \$0.015 per ounce excise tax (SSBs and ASBs)                    | Price changes, SSB sales, sales/substitution, UC (cross-border) | CBA                           | Scanner: IRI retail                                            | All    | High | No <sup>c</sup> |
| Silver et al, <sup>89</sup> 2017 | Berkeley, US     | \$0.01 per ounce excise tax (SSBs)                              | Price changes                                                   | Controlled ITS                | Scanner: two grocery chains                                    | All    | High | Yes             |
|                                  |                  |                                                                 |                                                                 | Uncontrolled before and after | Primary: store audits                                          |        | Low  |                 |
|                                  |                  |                                                                 | SSB sales, sales/substitution, UC (cross-border)                | Controlled ITS                | Scanner: two grocery chains                                    |        | High |                 |
|                                  |                  |                                                                 | SSB consumption, consumption/substitution                       | Uncontrolled before and after | Primary: consumer survey                                       | Adults | Low  |                 |
| Stacey et al, <sup>67</sup> 2019 | South Africa     | 0.021 ZAR (~\$0.0015) per g sugar >4 g/100 ml excise tax (SSBs) | Price changes, product change                                   | Uncontrolled ITS              | Administrative: Statistics South Africa's Consumer Price Index | All    | High | Yes             |



|                                                                 |                      |                                                                                                                        |                                                     |                                                |                                                                |        |        |     |
|-----------------------------------------------------------------|----------------------|------------------------------------------------------------------------------------------------------------------------|-----------------------------------------------------|------------------------------------------------|----------------------------------------------------------------|--------|--------|-----|
| Taylor et al, <sup>90</sup><br>2019                             | Berkeley,<br>US      | \$0.01 per<br>ounce excise<br>tax (SSBs)                                                                               | SSB sales, sales/<br>substitution                   | Before and<br>after with<br>counterfactu<br>al | Scanner:<br>university<br>campus retail,<br>Nielsen retail     | Adults | Medium | Yes |
| Vall Castelló<br>and Lopez<br>Casasnovas, <sup>11</sup><br>2020 | Catalonia,<br>Spain  | €0.08 per<br>liter (5-8 g<br>sugar/100ml<br>) and €0.12<br>per liter (≥8<br>g<br>sugar/100ml<br>) excise tax<br>(SSBs) | Price changes                                       | Uncontrolled<br>before and<br>after            | Scanner: one<br>supermarket<br>chain                           | All    | Low    | Yes |
|                                                                 |                      |                                                                                                                        | SSB sales, sales/<br>substitution                   | Uncontrolled<br>ITS                            |                                                                |        | Medium |     |
| Zenk et al, <sup>102</sup><br>2020                              | Oakland,<br>US       | \$0.01 per<br>ounce excise<br>tax (SSBs)                                                                               | UC (advertising)                                    | CBA                                            | Primary: store<br>audits                                       | All    | Medium | Yes |
| Zhang and<br>Palma, <sup>91</sup><br>2020                       | Berkeley,<br>US      | \$0.01 per<br>ounce excise<br>tax (SSBs)                                                                               | Price changes                                       | CBA                                            | Scanner:<br>Nielsen retail<br>and Nielsen<br>Consumer<br>Panel | All    | High   | Yes |
| Zhong et al, <sup>74</sup><br>2018                              | Philadelphi<br>a, US | \$0.015 per<br>ounce excise<br>tax (SSBs,<br>ASBs)                                                                     | SSB<br>consumption,<br>consumption/<br>substitution | CBA                                            | Primary:<br>consumer<br>survey                                 | Adults | Low    | Yes |
| Zhong et al, <sup>75</sup><br>2020                              | Philadelphi<br>a, US | \$0.015 per<br>ounce excise<br>tax (SSBs,<br>ASBs)                                                                     | SSB<br>consumption,<br>consumption/<br>substitution | CBA                                            | Primary:<br>consumer<br>survey                                 | Adults | Low    | Yes |

*Abbreviations:* SSBs, sugar-sweetened beverages; ASBs, artificially-sweetened beverages; ITS, interrupted time series analysis; CBA, controlled before and after study; UC, unintended consequences; BMI, body mass index; INEGI, Mexico's Statistics Institute (*Instituto Nacional de Estadística y Geografía*, Spanish); ENIGH, National Income and Expenditure Household Survey (in Spanish); EMIM, Monthly Surveys of the Manufacturing Industry (in Spanish); NHANES, National Health and Nutrition Examination Survey; BRFSS, Behavioral Risk Factor Surveillance System.

*Notes:*

An ITS design is defined as a study design that uses longitudinal data and has three or more post-treatment periods. An ITS was further classified as a controlled ITS, ITS with a counterfactual, and uncontrolled ITS. A controlled ITS used non-treated sites as a comparison; an ITS with a counterfactual used a counterfactual that was not untreated sites, for example, the pre-treatment trend or untaxed beverages; an uncontrolled ITS did not have any type of comparison group. A before and after study used longitudinal data and made comparisons in two time periods: before and after tax implementation. Before and after studies were further classified as CBA, before and after with a counterfactual, uncontrolled before and after. The criteria for these classifications are the same as the ITS study designs. A cross-sectional study with fixed effects used repeated cross-sectional data and included fixed effects in their statistical model.

<sup>a</sup> Based on the study description;

<sup>b</sup> Not reporting #s of participants due to differences in the type of participants across studies (e.g., products, households, stores);

<sup>c</sup> Published in peer-reviewed literature since the end date of the review (June 1, 2020).

**eTable 3. Summary of Sensitivity and Sub-group Meta-Analyses**

| Outcome                                           | Exclusion of Outlier Studies |                          |         |                                                       | Exclusion of Studies with Extreme Variance |                          |         |                                                       | Sub-Group of High Quality Studies |                          |         |                                                       |
|---------------------------------------------------|------------------------------|--------------------------|---------|-------------------------------------------------------|--------------------------------------------|--------------------------|---------|-------------------------------------------------------|-----------------------------------|--------------------------|---------|-------------------------------------------------------|
|                                                   | # studies                    | Pooled estimate (95% CI) | P-value | Heterogeneity: Q (P-value); I <sup>2</sup> % (95% CI) | # studies                                  | Pooled estimate (95% CI) | P-value | Heterogeneity: Q (P-value); I <sup>2</sup> % (95% CI) | # studies                         | Pooled estimate (95% CI) | P-value | Heterogeneity: Q (P-value); I <sup>2</sup> % (95% CI) |
| Price: tax pass through, %                        | 33                           | 84.4 (73.1 to 95.6)      | <.001   | 225 (<.001); 85.8 (81.0 to 89.3)                      | N/A                                        |                          |         |                                                       | 32                                | 78.7 (60.4 to 97.0)      | <.001   | 5,087 (0); 99.4 (99.3 to 99.5)                        |
| SSB sales: % change in demand                     | 17                           | -7.8 (-10.8 to -4.7)     | <.001   | 304 (<.001); 94.7 (92.9 to 96.1)                      | 33                                         | -14.4 (-20.3 to -8.5)    | <.001   | 13,112 (0); 99.8 (99.7 to 99.8)                       | 22                                | -12.9 (-19.7 to -6.0)    | <.001   | 709,041 (0); 100                                      |
| SSB sales: price elasticity                       | 20                           | -1.57 (-1.89 to -1.25)   | <.001   | 1,126 (<.001); 98.3 (98.0-98.6)                       | 33                                         | -1.56 (-2.11 to -1.02)   | <.001   | 8,194 (0); 99.6 (99.6; 99.6)                          | 22                                | -1.39 (-1.86 to -0.91)   | <.001   | 121,923 (0); 100                                      |
| Sales, substitution: cross-price elasticity       | 23                           | 0.28 (-0.27 to 0.83)     | .30     | 980 (<.001); 97.8 (97.3 to 98.2)                      | 23                                         | 0.38 (-0.56 to 1.32)     | .41     | 370 (<.001); 94.1 (92.2 to 95.5)                      | 17                                | 0.24 (-0.25 to 0.73)     | .32     | 955 (<.001); 98.3 (97.9 to 98.6)                      |
| SSB consumption: % change in demand               | N/A                          |                          |         |                                                       | N/A                                        |                          |         |                                                       | 0                                 |                          |         |                                                       |
| SSB consumption: price elasticity                 | N/A                          |                          |         |                                                       | N/A                                        |                          |         |                                                       | 0                                 |                          |         |                                                       |
| Consumption, substitution: cross-price elasticity | 10                           | 0.06 (-0.10 to 0.22)     | .42     | 4 (0.91) 0 (0 to 62.4)                                | N/A                                        |                          |         |                                                       | 0                                 |                          |         |                                                       |

*Abbreviations:* SSB, sugar-sweetened beverages, CI, confidence interval, N/A, not available, no studies identified as outliers or studies with extreme variance.

| <b>eTable 4. Sources of Heterogeneity (<math>\tau^2</math>) for 3-Level Random Effects Models</b> |                                               |                      |
|---------------------------------------------------------------------------------------------------|-----------------------------------------------|----------------------|
|                                                                                                   | <b>Source of <math>\tau^2</math> (95% CI)</b> |                      |
| <b>Outcome</b>                                                                                    | <b>Tax Jurisdiction</b>                       | <b>Study</b>         |
| SSB consumption, price elasticity of taxed beverages                                              | 24.4 (6.3, 160.0)                             | < 0.0001 (0.0, 1.6)  |
| SSB Sales, price elasticity of taxed beverages                                                    | 0.2 (0.0, 1.5)                                | 1.1 (0.5, 2.4)       |
| Consumption of substitution beverages                                                             | 0.8 (0.0, 11.3)                               | < 0.0001 (0.0, 0.41) |
| Indirect sales of substitution beverages                                                          | 0.4 (0.0, 7.2)                                | 3.4 (1.3, 8.7)       |
| Tax pass through rate                                                                             | 0.07 (0.0, 0.2)                               | 0.06 (0.0, 0.1)      |
| SSB consumption, percent change in demand                                                         | 0.03 (0.0, 0.23)                              | <0.0001 (0.0, 0.06)  |
| SSB sales, percent change in demand                                                               | 0.001 (0.001, 0.03)                           | 0.004 (0.002, 0.01)  |
|                                                                                                   |                                               |                      |

**eFigure 1. Meta-analysis of SSB Sales Following SSB Taxes: Percentage Change in Demand for Taxed Beverages**

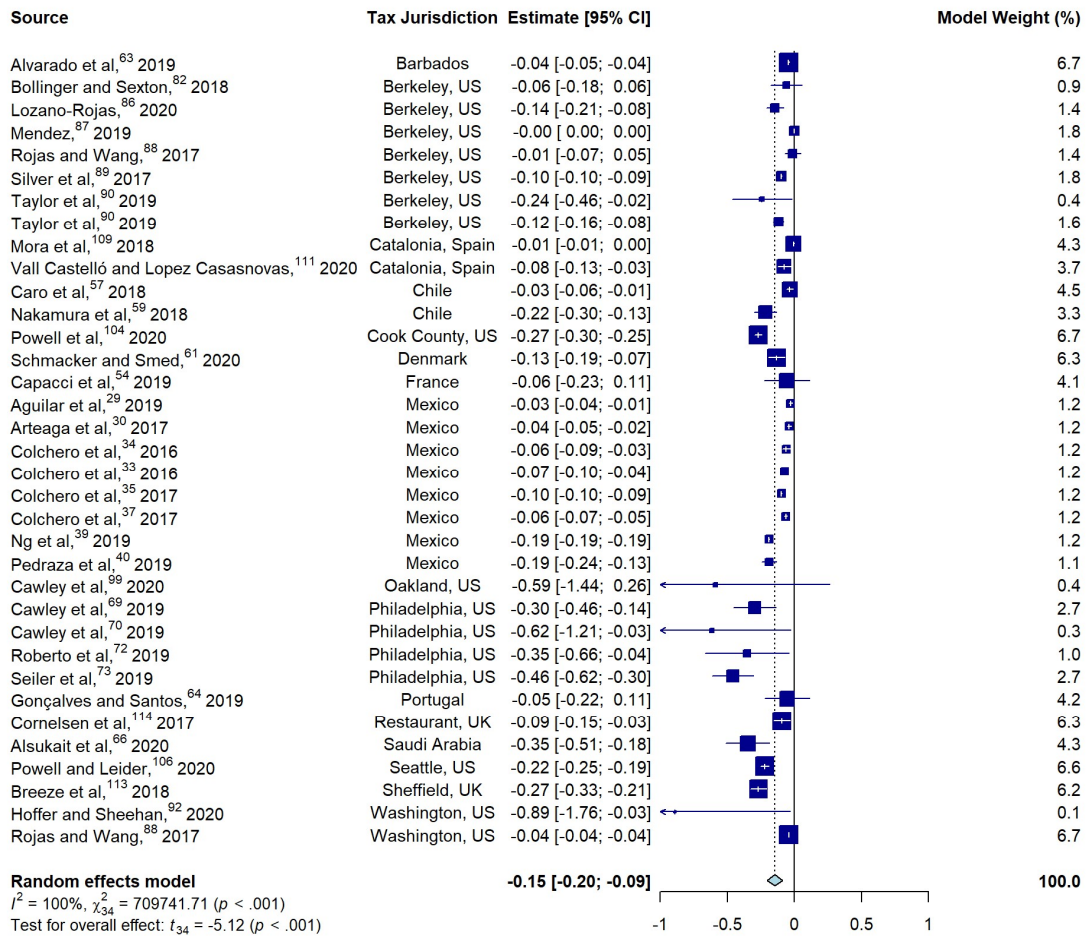

Abbreviations: SSBs, sugar-sweetened beverages.

**eFigure 2. Meta-analysis of Substitution Beverage Sales Following SSB Taxes: Cross-Price Elasticity**

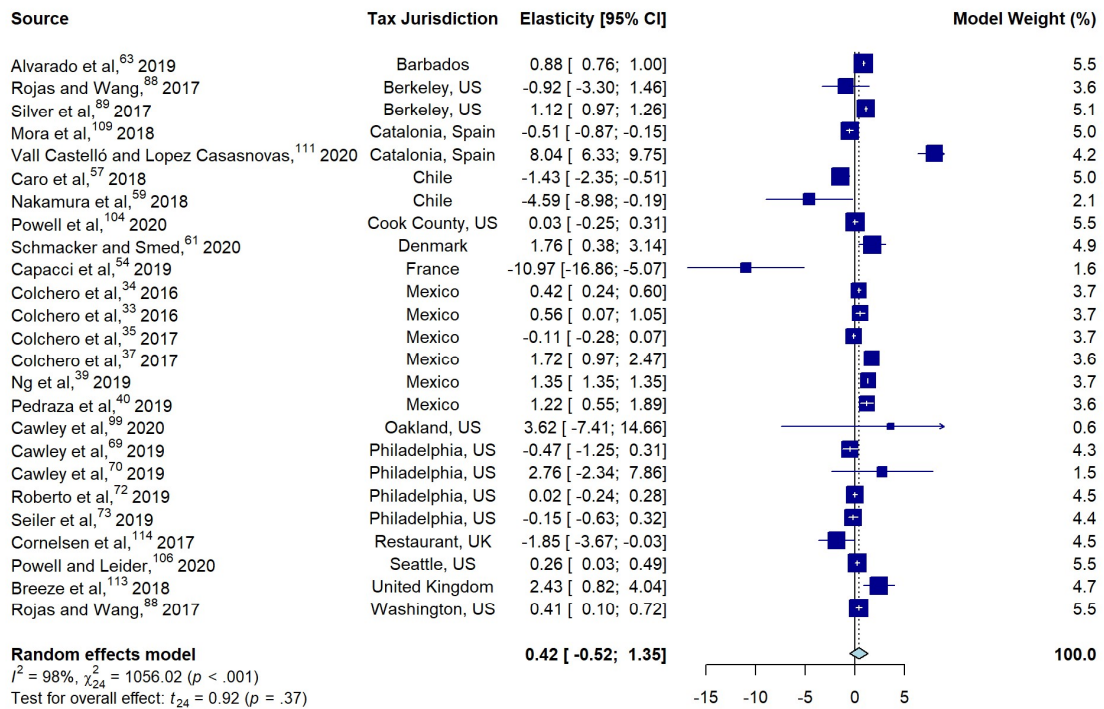

Abbreviations: SSBs, sugar-sweetened beverages.

**eFigure 3. Meta-analysis of SSB Consumption Following SSB Taxes: Price Elasticity of Demand for Taxed Beverages**

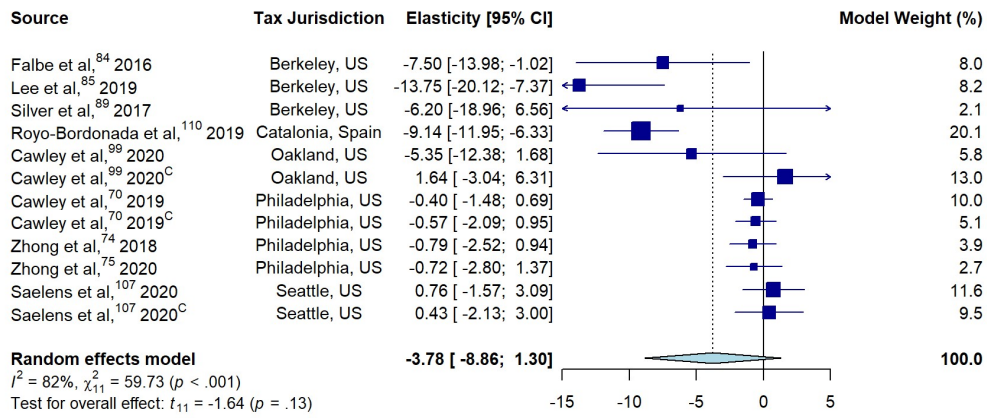

Abbreviations: SSBs, sugar-sweetened beverages.

**eFigure 4. Meta-analysis of SSB Consumption Following SSB Taxes: Percentage Change in Demand for Taxed Beverages**

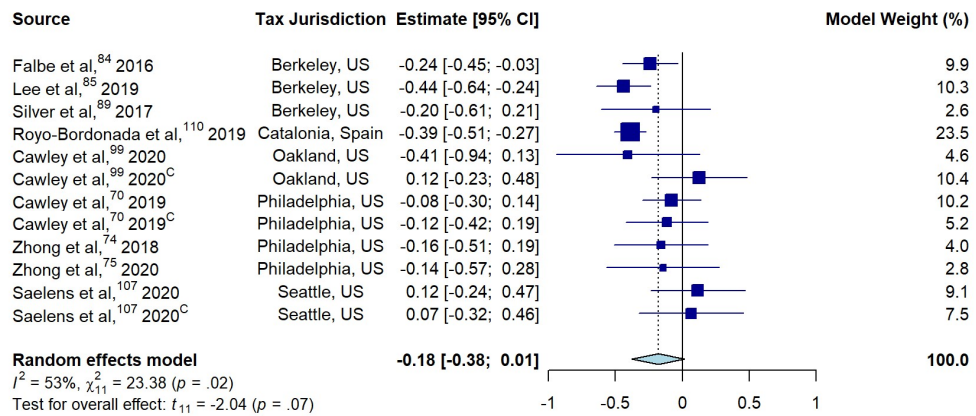

Abbreviations: SSBs, sugar-sweetened beverages.



**eFigure 5. Meta-analysis of Consumption of Substitution Beverages Following SSB Taxes: Cross-Price Elasticity**

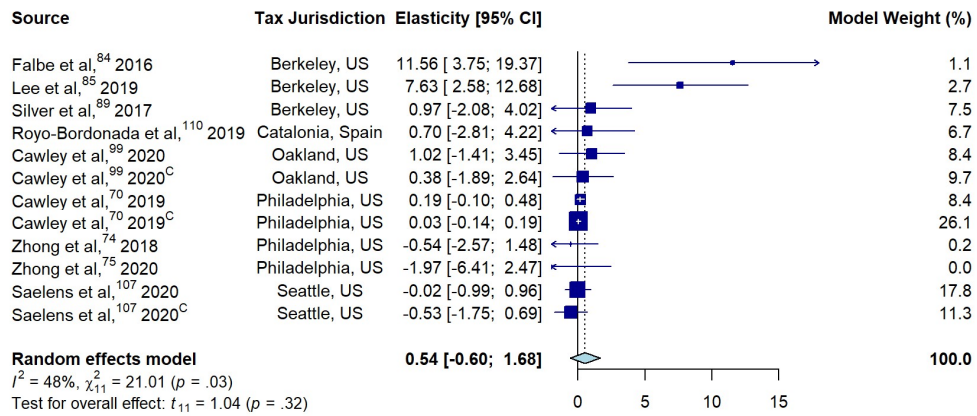

Abbreviations: SSBs, sugar-sweetened beverages.

**eFigure 6. Publication Bias: Funnel Plots**

Price Effects: Tax Pass-Through Rate Egger's test is not significant ( $p=0.88$ ).

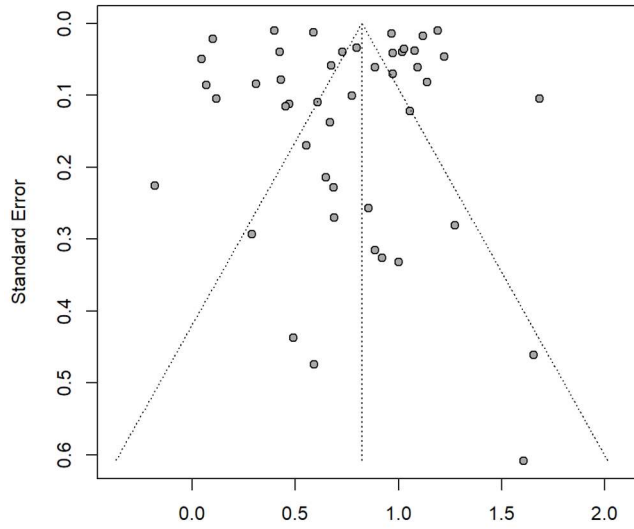

**b) Sales of Substitution Beverages**

- Eggers' test is significant ( $p<0.001$ ).

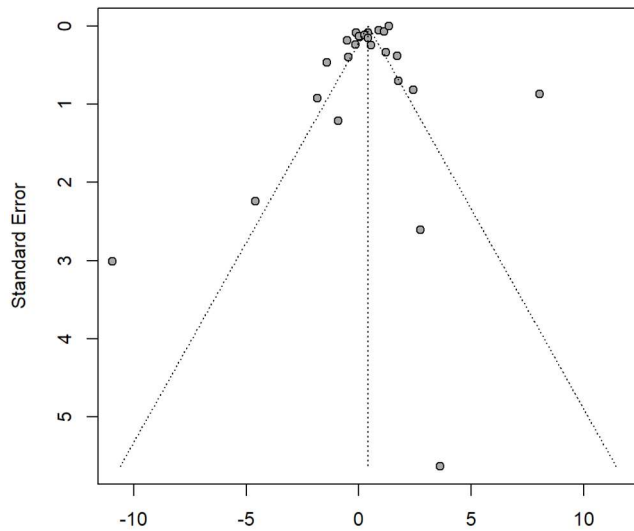

**c) Consumption of Taxes Beverages: : Percent Change in Demand**

Egger's test is significant ( $p=0.02$ ).

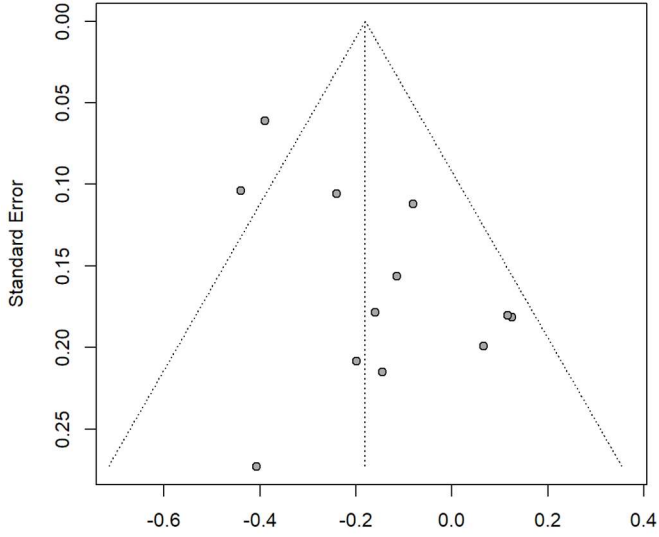

Supplement: jamanetwopen-e2215276-s001.pdf [file jamanetwopen-e2215276-s001.pdf]
